# Supplementary material for: HDACi inhibits liposarcoma via targeting of the MDM2-p53 signaling axis and PTEN, irrespective of p53 mutational status
Source: PubMed Central journal article supplement (PMC4496371; doi:10.18632/oncotarget.3230), 2015-03-23
Supplement: oncotarget-06-10510-s001.pdf [file oncotarget-06-10510-s001.pdf]

## SUPPLEMENTARY FIGURE AND TABLES

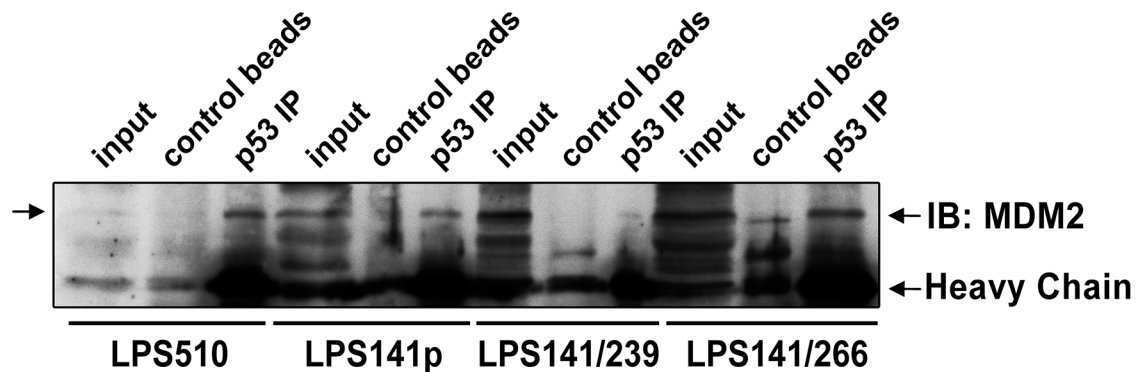

Supplementary Figure 1: MDM2-p53 interaction evaluated by p53 immunoprecipitation followed by MDM2 immunoblotting.

Supplementary Table 1: Cell apoptosis analyses (%), as shown in Figure 3F, after LBH and SAHA treatment

| Inhibitor  | DMSO |      |      |     | LBH (0.25 $\mu$ M) |      |      |      | SAHA (5 $\mu$ M) |      |      |      |
|------------|------|------|------|-----|--------------------|------|------|------|------------------|------|------|------|
|            | UL   | UR   | LL   | LR  | UL                 | UR   | LL   | LR   | UL               | UR   | LL   | LR   |
| LPS141     | 5.8  | 8.6  | 83.3 | 2.4 | 4.6                | 17.1 | 75.1 | 3.2  | 10.3             | 17.1 | 71.3 | 1.3  |
| LPS141/239 | 4.3  | 10.8 | 84.2 | 0.8 | 4.4                | 13.9 | 77.0 | 4.7  | 4.3              | 19.2 | 71.8 | 4.6  |
| LPS141/266 | 4.2  | 10.2 | 80.9 | 4.7 | 3.3                | 9.8  | 81.0 | 5.9  | 3.7              | 15.5 | 72.3 | 8.5  |
| LPS510     | 4.9  | 7.1  | 87.1 | 0.9 | 5.6                | 14.4 | 70.3 | 9.7  | 6.8              | 10.3 | 80.7 | 2.2  |
| LPS778     | 9.3  | 7.4  | 77.6 | 5.7 | 8.1                | 22.7 | 54.6 | 14.6 | 5.7              | 23.0 | 55.3 | 16.1 |

Supplementary Table 2: Cell cycle analyses (%), as shown in Figure 3G, after LBH and SAHA treatment

| Inhibitor          | LPS141           |                |    |    | LPS141/266       |                |   |   | LPS141/239       |                |   |   | LPS778           |                |    |   | LPS510           |                |    |    |
|--------------------|------------------|----------------|----|----|------------------|----------------|---|---|------------------|----------------|---|---|------------------|----------------|----|---|------------------|----------------|----|----|
|                    | G <sub>1/0</sub> | G <sub>2</sub> | S  | A  | G <sub>1/0</sub> | G <sub>2</sub> | S | A | G <sub>1/0</sub> | G <sub>2</sub> | S | A | G <sub>1/0</sub> | G <sub>2</sub> | S  | A | G <sub>1/0</sub> | G <sub>2</sub> | S  | A  |
| DMSO               | 61               | 27             | 12 | 0  | 66               | 28             | 6 | 0 | 57               | 33             | 9 | 1 | 66               | 20             | 13 | 1 | 46               | 28             | 10 | 16 |
| LBH (0.25 $\mu$ M) | 31               | 41             | 18 | 10 | 29               | 65             | 4 | 2 | 27               | 64             | 6 | 3 | 58               | 27             | 7  | 8 | 45               | 26             | 7  | 22 |
| SAHA (5 $\mu$ M)   | 41               | 43             | 15 | 1  | 66               | 29             | 4 | 1 | 53               | 41             | 5 | 1 | 78               | 14             | 6  | 2 | 46               | 31             | 5  | 18 |

A indicates apoptosis before G1 peak.

**Supplementary Table 3: Cell cycle analyses (%), as shown in Figure 4D, after *MDM2* and *p53 shRNA* treatment**

| Cell lines<br>shRNAs        | LPS141           |                |    |   | LPS141/266       |                |   |   | LPS141/239       |                |    |    | LPS510           |                |    |    |
|-----------------------------|------------------|----------------|----|---|------------------|----------------|---|---|------------------|----------------|----|----|------------------|----------------|----|----|
|                             | G <sub>1/0</sub> | G <sub>2</sub> | S  | A | G <sub>1/0</sub> | G <sub>2</sub> | S | A | G <sub>1/0</sub> | G <sub>2</sub> | S  | A  | G <sub>1/0</sub> | G <sub>2</sub> | S  | A  |
| pLKO                        | 49               | 31             | 17 | 3 | 74               | 22             | 4 | 0 | 62               | 23             | 12 | 3  | 62               | 6              | 13 | 19 |
| MDM2 shRNA1                 | 73               | 17             | 7  | 3 | 70               | 23             | 6 | 1 | 41               | 31             | 17 | 11 | 56               | 4              | 9  | 31 |
| MDM2 shRNA2                 | 69               | 18             | 8  | 5 | 67               | 29             | 4 | 0 | 51               | 26             | 15 | 8  | 52               | 6              | 7  | 35 |
| p53 shRNA1                  | 50               | 30             | 18 | 2 | 68               | 25             | 6 | 1 | 45               | 35             | 15 | 5  | 63               | 12             | 11 | 18 |
| p53 shRNA2                  | 51               | 30             | 16 | 3 | 67               | 28             | 5 | 0 | 38               | 34             | 16 | 12 | 59               | 13             | 6  | 22 |
| MDM2 shRNA1 +<br>p53 shRNA1 | 54               | 28             | 17 | 1 | 65               | 29             | 5 | 1 | 40               | 31             | 12 | 17 | 55               | 12             | 5  | 28 |

A indicates apoptosis before G1 peak.
